# Supplementary material for: Expansion and diversification of high-latitude radiolarian assemblages in the late Eocene linked to a cooling event in the southwest Pacific
Source: Copernicus journal article supplement (doi:10.5194/cp-11-1599-2015), 2015-12-07
Supplement: Supplementary file 2 [file cp-11-1599-2015-supplement.zip]

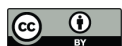

## *Supplement of*

# **Expansion and diversification of high-latitude radiolarian assemblages in the late Eocene linked to a cooling event in the southwest Pacific**

**K. M. Pascher et al.**

*Correspondence to:* K. M. Pascher (k.pascher@gns.cri.nz)

- cp-11-1599-2015-supplement-title-page.pdf
- Supplementary Material.xlsx
- Taxonomic Notes\_Plates 1-5.pdf

The copyright of individual parts of the supplement might differ from the CC-BY 3.0 licence.
